# Supplementary material for: Newly Synthesized Oxygenated Xanthones as Potential P-Glycoprotein Activators: In Vitro, Ex Vivo, and In Silico Studies
Source: Molecules. 2019 Feb 15;24(4):707. doi: 10.3390/molecules24040707 (PMC6412186; doi:10.3390/molecules24040707)
Supplement: Supplementary file 1 [file molecules-24-00707-s001.pdf]

## SUPPLEMENTARY MATERIALS

Article

# Newly synthesized oxygenated xanthenes as potential P-glycoprotein activators—*in vitro*, *ex vivo* and *in silico* studies

Eva Martins<sup>1</sup>, Vera Silva<sup>1</sup>, Agostinho Lemos<sup>2</sup>, Andreia Palmeira<sup>2</sup>, Ploenthip Puthongking<sup>3</sup>, Emília Sousa<sup>2,4\*</sup>, Carolina Rocha-Pereira<sup>1</sup>, Carolina I. Ghanem<sup>5</sup>, Helena Carmo<sup>1</sup>, Fernando Remião<sup>1\*</sup> and Renata Silva<sup>1\*</sup>

<sup>1</sup> UCIBIO-REQUIMTE, Laboratório de Toxicologia, Departamento de Ciências Biológicas, Faculdade de Farmácia, Universidade do Porto, Rua de Jorge Viterbo Ferreira, 228, 4050-313 Porto, Portugal; [evagilmartins18@gmail.com](mailto:evagilmartins18@gmail.com) (E.M.); [veralssilva17@gmail.com](mailto:veralssilva17@gmail.com) (V.S.); [mcamorim@ff.up.pt](mailto:mcamorim@ff.up.pt) (C.R-P.); [helenacarmo@ff.up.pt](mailto:helenacarmo@ff.up.pt) (H.C.); [remiao@ff.up.pt](mailto:remiao@ff.up.pt) (F.R.); [rsilva@ff.up.pt](mailto:rsilva@ff.up.pt) (R.S.)

<sup>2</sup> Laboratório de Química Orgânica e Farmacêutica, Departamento de Ciências Químicas, Faculdade de Farmácia, Universidade do Porto, Rua Jorge Viterbo Ferreira 228, 4050-313 Porto, Portugal; [up201002662@ff.up.pt](mailto:up201002662@ff.up.pt) (A.L.); [apalmeira@ff.up.pt](mailto:apalmeira@ff.up.pt) (A.P.); [esousa@ff.up.pt](mailto:esousa@ff.up.pt) (E.S.)

<sup>3</sup> Faculty of Pharmaceutical Sciences, Khon Kaen University, 40002 Khon Kaen, Thailand; [pploenthip@gmail.com](mailto:pploenthip@gmail.com)

<sup>4</sup> Centro Interdisciplinar de Investigação Marinha e Ambiental (CIIMAR/CIMAR), Universidade do Porto, Rua dos Bragas 289, 4050-123 Porto, Portugal

<sup>5</sup> Universidad de Buenos Aires, CONICET, Facultad de Farmacia y Bioquímica, Instituto de Investigaciones Farmacológicas (ININFA), Buenos Aires, Argentina; [cghanem@ffyb.uba.ar](mailto:cghanem@ffyb.uba.ar)

\* Correspondence: [esousa@ff.up.pt](mailto:esousa@ff.up.pt) (E.S.), [remiao@ff.up.pt](mailto:remiao@ff.up.pt) (F.R.), [rsilva@ff.up.pt](mailto:rsilva@ff.up.pt) (R.S.); Tel.: +351-22-0428598 (F.R. and R.S.); +351-22-0428689 (E.S.)

\*Correspondence: [remiao@ff.up.pt](mailto:remiao@ff.up.pt), [esousa@ff.up.pt](mailto:esousa@ff.up.pt), [rsilva@ff.up.pt](mailto:rsilva@ff.up.pt); Tel.: +351-22-042889

Academic Editor: name

Received: date; Accepted: date; Published: date

**Figure S1**

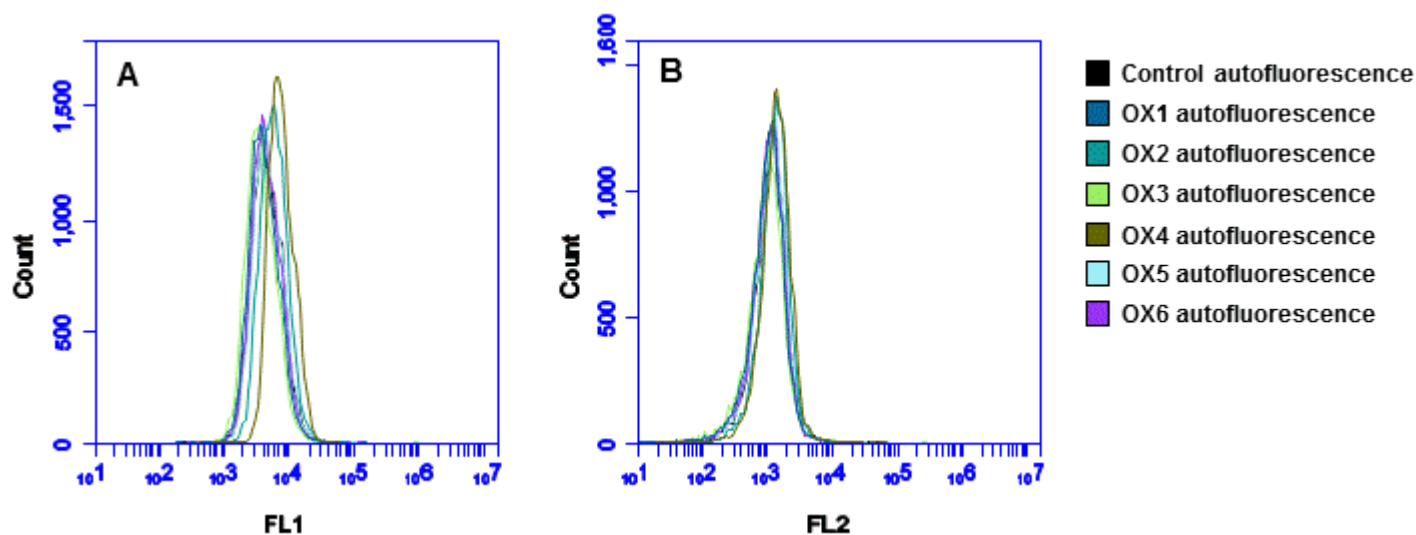

**Figure S1.** Representative histograms of flow cytometry analysis of Caco-2 cells autofluorescence in the  $530 \pm 15$  nm band-pass filter (A - FL1 detector) and in the  $585 \pm 40$  nm band-pass filter (B - FL2 detector), 24 h after the incubation with the tested oxygenated xanthenes OX 1-6 (20.0  $\mu$ M).

**Figure S2**

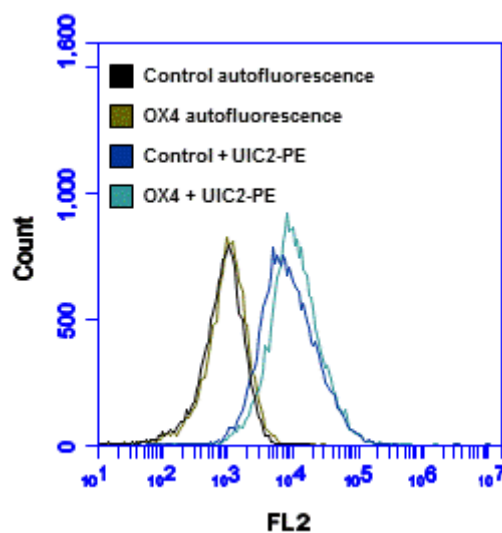

**Figure S2.** Representative histograms of flow cytometry analysis of P-glycoprotein (P-gp) expression, evaluated 24 h after exposure of Caco-2 cells to the oxygenated xanthone OX4 (20.0  $\mu$ M), using the UIC2-PE monoclonal antibody ( $585 \pm 40$  nm band-pass filter - FL2 detector).

**Figure S3**

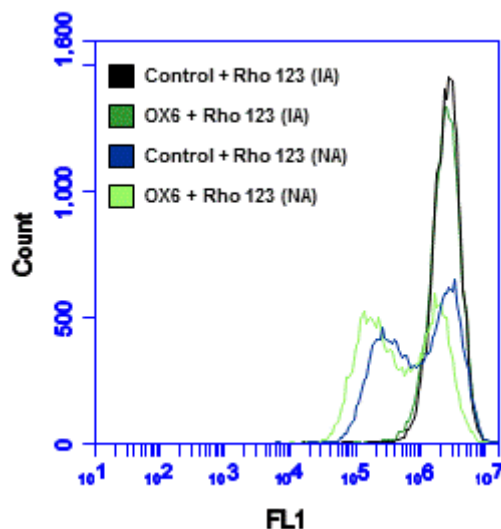

**Figure S3.** Representative histograms of flow cytometry analysis of P-glycoprotein (P-gp) activity, evaluated 1 h after exposure of Caco-2 cells to the oxygenated xanthone OX6 (20.0  $\mu$ M), using Rhodamine (Rho 123) as a fluorescent substrate (530  $\pm$  15 nm band-pass filter - FL1 detector). IA (inhibited accumulation), NA (normal accumulation).

**Figure S4**

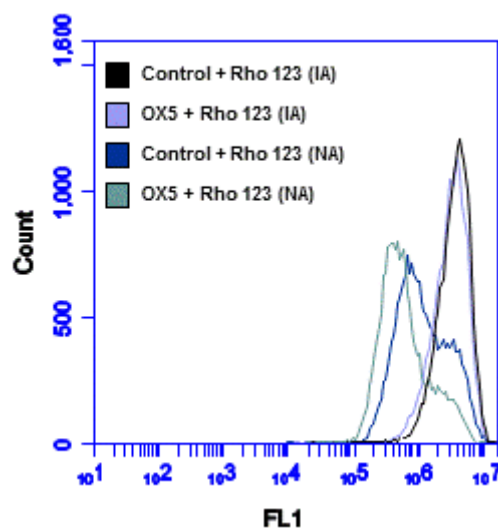

**Figure S4.** Representative histograms of flow cytometry analysis of P-glycoprotein (P-gp) activity, evaluated 24 h after exposure of Caco-2 cells to the oxygenated xanthone OX5 (20.0  $\mu$ M), using Rhodamine (Rho 123) as a fluorescent substrate (530  $\pm$  15 nm band-pass filter - FL1 detector). IA (inhibited accumulation), NA (normal accumulation).

Figure S5

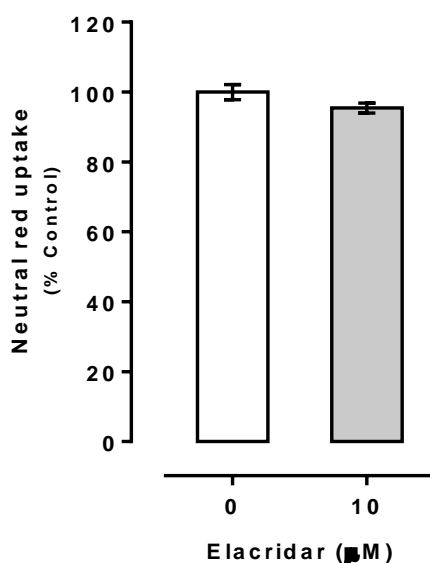

**Figure S5.** Elacridar (Ela, 0 - 10.0  $\mu$ M) cytotoxicity in Caco-2 cells evaluated by the Neutral Red (NR) uptake assay, 24 h after incubation. Results are presented as mean  $\pm$  SEM from 3 independent experiments, performed in triplicate. Statistical comparisons were made using the Unpaired  $t$  test.

Figure S6

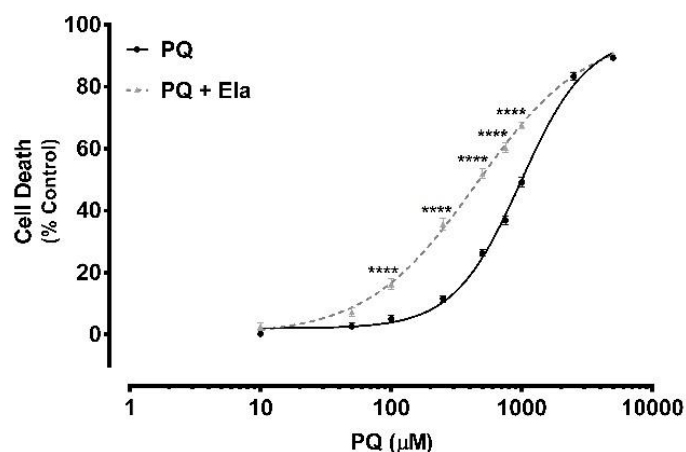

**Figure S6.** Paraquat (PQ) concentration-response (cell death) curve obtained in the absence (PQ) or in the presence of 10.0  $\mu$ M Elacridar (PQ + Ela). Results are presented as mean  $\pm$  SEM from 4 independent experiments (performed in triplicate). Concentration-response curve was fitted using least squares as the fitting method and the comparison between PQ and PQ + Ela curves (LOG EC<sub>50</sub>, TOP, BOTTOM, and Hill Slope) was made using the extra sum-of-squares F test. Statistical comparisons were made using Two-way ANOVA, followed by the Sidak's multiple comparisons post hoc test (\*\*\* $p$  < 0.0001 PQ + Ela vs. PQ). In all cases,  $p$  values < 0.05 were considered statistically significant.

**Table S1**

**Table S1.** EC<sub>50</sub> (half-maximum-effect concentrations), TOP (maximal effect), BOTTOM (baseline) and Hill Slope values of the paraquat (PQ) concentration-response curve, with (PQ + Ela) or without (PQ) simultaneous exposure to Elacridar (10.0  $\mu$ M).

|                                                                         | PQ           | PQ + Ela           |
|-------------------------------------------------------------------------|--------------|--------------------|
| <b>EC<sub>50</sub></b><br>(half-maximum-effect concentrations, $\mu$ M) | <b>982.4</b> | <b>450.3****</b>   |
| <b>Top</b><br>(maximal cell death, % control)                           | 96.65        | 97.76              |
| <b>Bottom</b><br>(baseline, % control)                                  | 2.008        | -0.2621            |
| <b>Hill slope</b>                                                       | <b>1.694</b> | <b>1.039****</b>   |
| <b>Curve <i>p</i> value</b><br>(Comparison between the fitted curves)   | -            | <b>&lt; 0.0001</b> |

Concentration-response curves were fitted using least squares as the fitting method and the comparisons between PQ and PQ + Ela curves were made using extra sum-of-squares F test. In all cases, *p* values < 0.05 were considered significant (\*\*\*\**p* < 0.0001 for PQ vs. PQ + Ela). Bold is used when significant exists.
